# Supplementary material for: A nonvolatile magnon field effect transistor at room temperature
Source: Research Square preprint supplement (doi:10.21203/rs.3.rs-3231279/v1), 2023-12-27
Supplement: Supplementary file 1 [file a54e6ae021a0d328f22c30b2.docx]

Supplementary Information for

**A nonvolatile magnon field effect transistor at room temperature**

**Authors:** Jun Cheng, Rui Yu, Bingfeng Miao, Liang Sun, Kang He, Tongzhou Ji,

Man Yang, Zeyuan Zhang, Xueli Hu, Heng Niu, Xi Yang, Gong Chen, Jiang Xiao,

Fengzhen Huang, Xiaomei Lv, Haifeng Ding*

Corresponding author. Email: hfding@nju.edu.cn

**Contents**

Supplementary Note 1. The structure and magnetic properties of YIG film

Supplementary Note 2. The leakage current curve of the device and ferroelectric hysteresis loop of PMN‑PT substrate

Supplementary Note 3. The -dependence measurements

Supplementary Note 4. The stability of additional device

Supplementary Note 5. The SMR of G-layer Pt stripe with Vg=±200 V

Supplementary Note 6. The piezoelectric force microscopy (PFM) measurements of PMN-PT substrate

References

**Supplementary Note 1. The structure and magnetic properties of YIG film**

The structure information of PMN-PT/YIG(60 nm) sample is characterized by the X-ray diffraction (XRD) measurements. As presented in Supplementary Fig. 1a, the YIG film is polycrystalline without an apparently preferred orientation on the PMN-PT substrate1. We also measured the magnetic hysteresis loop of the YIG thin film using a vibrating sample magnetometer (VSM), the VSM measurement yields the magnetization to be 1.36×105A/m, which is similar to the value obtained in YIG films grown on GGG substrate2. Besides, the results indicate that the YIG thin film is in-plane magnetized, with the coercive fields of 33.7 Oe and 34.9 Oe along the two in-plane directions ([100] and ), respectively (Supplementary Fig. 1b). These values are similar to YIG films grown on the thermally oxidized silicon substrate3.

**Supplementary Fig. 1 | Structure and magnetic properties of the YIG film.** **a** X-ray diffraction spectrum of a typical PMN-PT/YIG(60 nm) sample, the numbers marked in the figure represent different planes of YIG. The two main peaks come from the (011) and (022) plane of the PMN-PT(011) substrate, respectively. The YIG film is polycrystalline without an apparently preferred orientation on the PMN-PT substrate. **b** Normalized hysteresis loop of the YIG(60 nm) thin film measured by vibrating sample magnetometer. The blue curve corresponds to the measurements with the magnetic field along the [011] direction (out of plane). The red and black curves correspond to the ones with the magnetic field along the in-plane [100] and direction, respectively.

**Supplementary Note 2. The leakage current curve of the device and ferroelectric hysteresis loop of PMN‑PT substrate**

We also measured the in-plane and out-of-plane I-V curves. As shown in Supplementary Figs. 2a and 2b, the resistance along the vertical (in-plane) direction is ~100 (10) GΩ, respectively. These indicate that the YIG film maintains insulating upon applying the gate voltage. Supplementary Figure 2c presents the ferroelectric hysteresis loop (P-E loop) of a clean PMN-PT(011) substrate. Both leakage current curve (Supplementary Fig. 2a) and polarization curve (Supplementary Fig. 2c) show the polarization reversal under an electric field4,5.

**Supplementary Fig. 2 | The leakage current curve and ferroelectric hysteresis loop. a** Leakage current as a function of the applied voltage *V* of a PMN-PT/YIG(60 nm)/Pt(3.5 nm) (device 1) sample. **b** The leakage current as a function of the applied voltage of YIG film between S-stripe and D-stripe in the film plane. **c**, Typical ferroelectric hysteresis loop of a clean PMN-PT(011) substrate. Both leakage current and polarization curves show the polarization reversal under an electric field.

**Supplementary Note 3. The** **-dependence measurements**

In the first- and second-harmonic measurements, we examined the dependence of the non-local voltage amplitudes on the injected AC current . The results (Supplementary Fig. 3) show a proportional relationship between the () amplitude and the (), respectively. Together with the angular dependent measurements, they indicate that originates from the electronically injected magnon current via the SHE and is due to the magnon current thermally excited via the spin Seebeck effect (SSE)6-8.

**Supplementary Fig. 3 |** **-dependent non-local magnon transport measurements. a** AC current dependent amplitude. **b** dependent amplitude. The symbols are the experimental data and the lines are the linear fittings. The results show a proportional relationship between the () amplitude and the (), respectively.

**Supplementary Note 4. The stability of additional device**

We prepared a new device and measured more circles to verify the stability. Supplementary Figure 4 shows the reversible nonlocal voltage variation with 21 cycles. Since this is the initial demonstration of the prototype device, we believe the optimization on the measurement technique and the design can further improve the performance of the device.

**Supplementary Fig. 4 |** The evolution of the nonlocal voltage signal with the gate voltage pulses .

**Supplementary Note 5. The SMR of G-layer Pt stripe with Vg=±200 V**

We measured the spin Hall magnetoresistance (SMR) of Pt G-stripe with gate voltage Vg=±200 V. As presented in Supplementary Fig. 5, the SMR ratio of Pt/YIG is almost independent of the gate voltage. Since the SMR measurement indicates the reflection property of the spin current (generated in Pt) at YIG/Pt interface, it suggests that the property of the YIG/Pt interface has no apparent change upon applying different gate voltages.

**Supplementary Fig. 5 |** The SMR of G-layer Pt stripe with Vg=±200 V.

**Supplementary Note 6. The piezoelectric force microscopy (PFM) measurements of PMN-PT substrate**

We performed the ferroelectric domain switching measurements with piezoelectric force microscopy (PFM) (Bruker, Dimension Icon). Supplementary Figures 6a and 6b present the typical morphology and out-of-plane PFM phase images of the (011)-oriented PMN-PT single crystal substrate before applying any electric pulse. The contrast in the PFM phase image indicates a multi-domain structure. After applying a voltage of +8 V on the tip during the scan in the central area (marked by the white dash square in Supplementary Fig. 6c), the out-of-plane PFM phase image shows that the area is positively polarized (dark grey color). After further applying a voltage of −8 V in a smaller area (marked by the red dash square in Supplementary Fig. 6d), the area turns to light yellow, indicating the area is negatively polarized. These measurements evidenced that the ferroelectric domain of our PMN-PT sample can be switched by the electric field, consist with the reports in literature9.


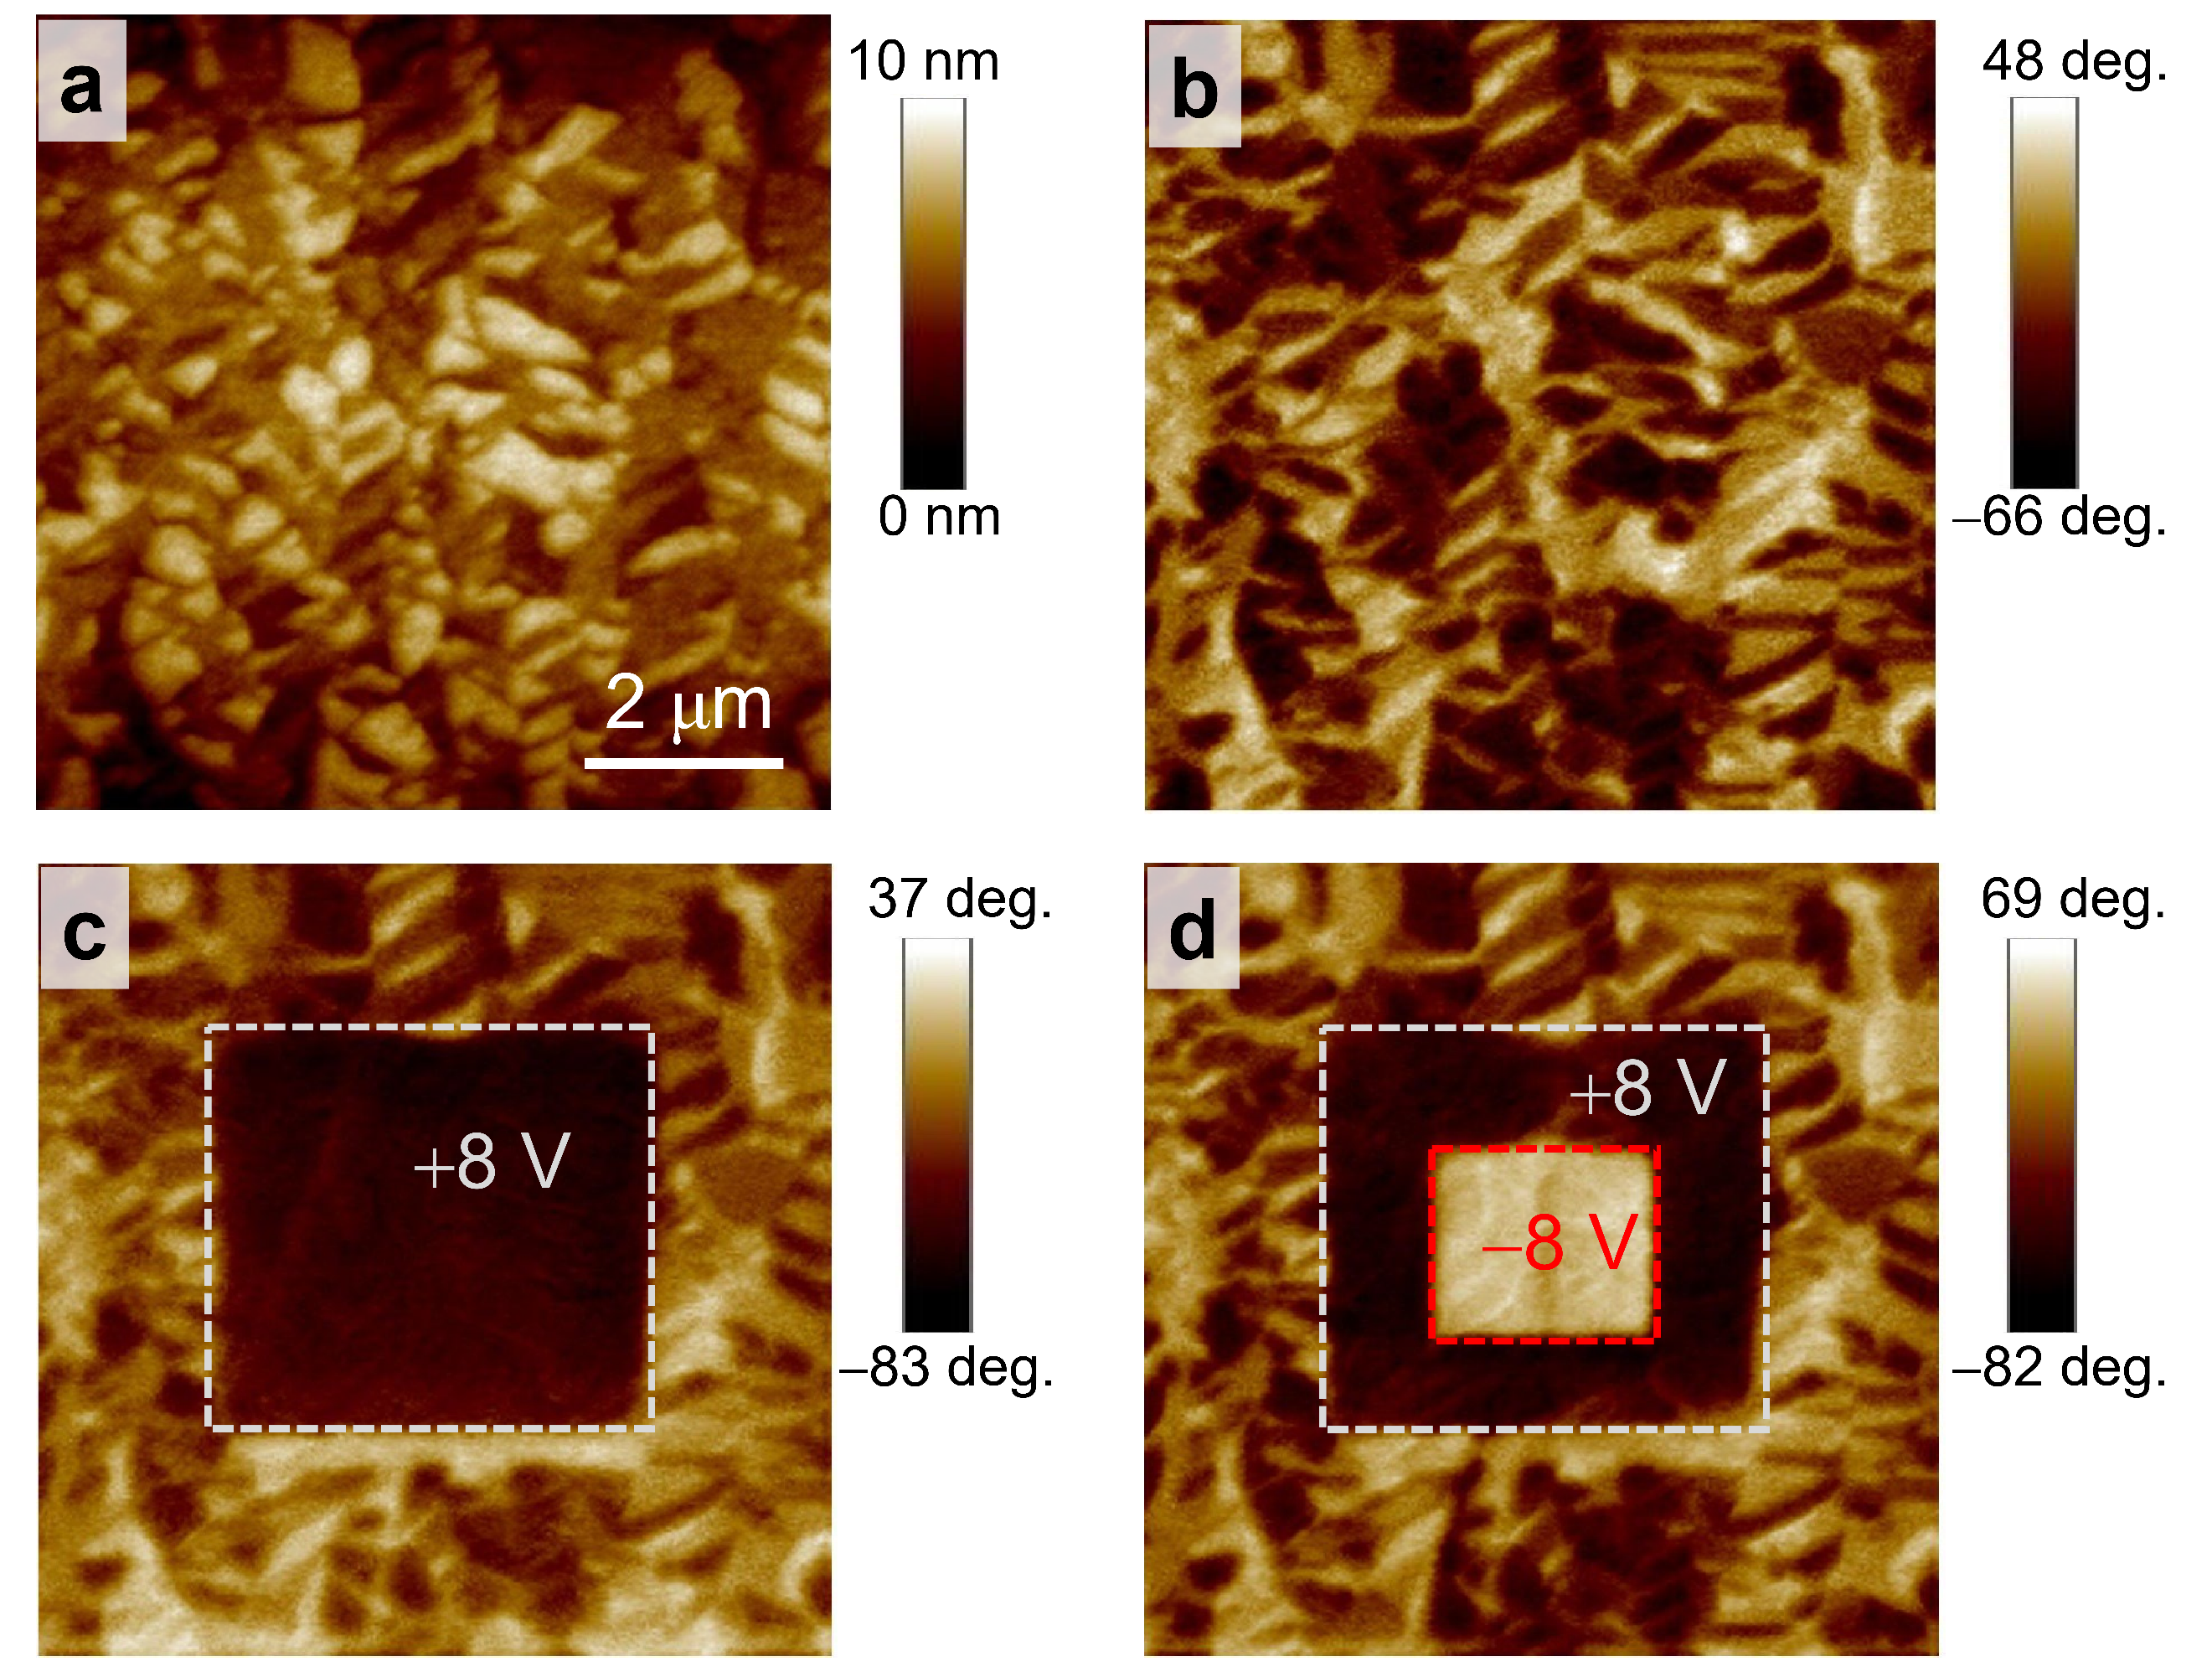


**Supplementary Fig. 6 | The PFM images of (011)-oriented PMN-PT single crystal substrate. a** the morphology of PMN-PT. **b** the initial out-of-plane PFM phase image before applying any electric pulse. Panels **c**, **d** are the sequential out-of-plane PFM phase images with applying +8 V and −8 V voltage biases in the marked area, respectively.

References

1. Yu, R. et al. Nonvolatile Electric-Field Control of Ferromagnetic Resonance and Spin Pumping in Pt/YIG at Room Temperature. *Adv. Electron. Mater.* **5**, 1800663 (2019).

2. Ding, J., Liu, T., Chang, H. & Wu, M. Sputtering Growth of Low-Damping Yttrium-Iron-Garnet Thin Films. *IEEE Magn. Lett.* **11**, 1-5 (2020).

3. Xiang, R. et al. Electrical generation and detection of spin waves in polycrystalline YIG/Pt grown on silicon wafers. *Mater. Res. Express* **7**, 046105 (2020).

4. Zhang, S. et al. Electric-Field Control of Nonvolatile Magnetization in Co40Fe40B20/Pb(Mg1/3Nb2/3)0.7Ti0.3O3 Structure at Room Temperature. *Phys. Rev. Lett.* **108**, 137203 (2012).

5. Hussain, A., Sinha, N., Joseph, A. J., Goel, S. & Kumar, B. Ferroelectric Sb-doped PMN-PT crystal: high electromechanical response with true-remanent polarization and resistive leakage analyses. *J. Mater. Sci.-Mater. Electron.* **29**, 19567-19577 (2018).

6. Cornelissen, L. J., Liu, J., Duine, R. A., Youssef, J. B. & van Wees, B. J. Long-distance transport of magnon spin information in a magnetic insulator at room temperature. *Nat. Phys.* **11**, 1022-1026 (2015).

7. Chen, G. et al. Electrically switchable van der Waals magnon valves. *Nat. Commun.* **12**, 6279 (2021).

8. Parsonnet, E. et al. Nonvolatile Electric Field Control of Thermal Magnons in the Absence of an Applied Magnetic Field. *Phys. Rev. Lett.* **129**, 087601 (2022).

9. Liu, M. et al. Non-volatile ferroelastic switching of the Verwey transition and resistivity of epitaxial Fe3O4/PMN-PT (011). *Sci. Rep.* **3**, 1876 (2013).
